# Supplementary material for: Characterization of Key Aroma-Active Compounds in Two Types of Peach Spirits Produced by Distillation and Pervaporation by Means of the Sensomics Approach
Source: MDPI journal article supplement (doi:10.3390/foods11172598), 2022-08-26
Supplement: s1 [file s1]

Table S1 The process condition parameters of pervaporation membrane in this study

|                                | Support layer                                       | Activate layer                          |
|--------------------------------|-----------------------------------------------------|-----------------------------------------|
| Material <sup>a</sup>          | Polyacrylonitrile<br>(PAN) ultrafiltration membrane | Polydimethylsiloxane<br>(PDMS) membrane |
| Thickness ( $\mu\text{m}$ )    | 30                                                  | 2                                       |
| Pore size (nm)                 | 50                                                  | -                                       |
| Membrane area ( $\text{m}^2$ ) | -                                                   | 0.1                                     |

<sup>a</sup> Membrane material information was reported by Sun *et al.* (2020). Operating temperature: 45 °C. Speed of the peristaltic pump: 140 rpm/min.

Table S2 Calibration curves for volatile compounds analyzed in this study.

| No.           | Compounds                         | CAS        | Method   | IS <sup>d</sup> | Quantitative Ion<br>( <i>m/z</i> ) | Slope   | Intercept | R <sup>2</sup> | Linear range<br>( $\mu\text{g/L}$ ) | LOQ<br>( $\mu\text{g/L}$ ) |
|---------------|-----------------------------------|------------|----------|-----------------|------------------------------------|---------|-----------|----------------|-------------------------------------|----------------------------|
| <b>Esters</b> |                                   |            |          |                 |                                    |         |           |                |                                     |                            |
| 1             | Ethyl acetate <sup>b</sup>        | 141-78-6   | SPME-SIM | IS1             | 74                                 | 193.230 | -0.046    | 0.998          | 1875-75000                          | <1875                      |
| 2             | Ethyl isobutyrate <sup>b</sup>    | 97-62-1    | SPME-SIM | IS1             | 71                                 | 5.964   | 0.004     | 0.994          | 9-375                               | 9                          |
| 3             | Isobutyl acetate <sup>b</sup>     | 110-19-0   | SPME-SIM | IS1             | 56                                 | 0.619   | -0.048    | 0.995          | 7.815-2000                          | <7.815                     |
| 5             | Ethyl isovalerate <sup>b</sup>    | 108-64-5   | SPME-SIM | IS1             | 88                                 | 2.755   | 0.004     | 0.996          | 6.24-2000                           | <6.24                      |
| 6             | Ethyl butyrate <sup>b</sup>       | 105-54-4   | SPME-SIM | IS1             | 71                                 | 2.722   | 0.007     | 0.996          | 160-10000                           | <160                       |
| 7             | Isoamyl acetate <sup>b</sup>      | 123-92-2   | SPME-SIM | IS1             | 70                                 | 1.547   | -0.042    | 0.997          | 600-30000                           | <600                       |
| 8             | Ethyl hexanoate <sup>b</sup>      | 123-66-0   | SPME-SIM | IS1             | 88                                 | 0.245   | -0.003    | 0.999          | 100-8000                            | <100                       |
| 9             | Hexyl acetate <sup>a</sup>        | 142-92-7   | LLE-SIM  | IS1             | 56                                 | 1.360   | 0.011     | 0.995          | 4.68-400                            | 4.68                       |
| 11            | Ethyl lactate <sup>a</sup>        | 97-64-3    | LLE-SIM  | IS1             | 75                                 | 0.861   | -0.049    | 0.998          | 11.7-3000                           | <11.7                      |
| 12            | Ethyl octanoate <sup>a</sup>      | 106-32-1   | LLE-SIM  | IS1             | 88                                 | 0.845   | 0.032     | 0.999          | 14-90000                            | 14                         |
| 16            | Isoamyl lactate <sup>a</sup>      | 19329-89-6 | LLE-SIM  | IS1             | 55                                 | 1.136   | 0.011     | 0.994          | 3.63-232                            | 3.63                       |
| 19            | Ethyl decanoate <sup>a</sup>      | 110-38-3   | LLE-SIM  | IS1             | 101                                | 0.172   | 0.463     | 0.993          | 2500-160000                         | <2500                      |
| 19            | Ethyl decanoate <sup>*a</sup>     | 110-38-3   | LLE-SIM  | IS1             | 101                                | 0.486   | 0.005     | 0.997          | 3.75-240                            | 3.75                       |
| 20            | Diethyl succinate <sup>a</sup>    | 123-25-1   | LLE-SIM  | IS1             | 101                                | 0.224   | 0.003     | 0.993          | 2.06-260.8                          | 2.06                       |
| 22            | Ethyl dodecanoate <sup>a</sup>    | 106-33-2   | LLE-SIM  | IS1             | 157                                | 1.70    | 0.107     | 0.993          | 92-1500                             | 92                         |
| 24            | Ethyl tetradecanoate <sup>a</sup> | 124-06-1   | LLE-SIM  | IS1             | 88                                 | 0.597   | 0.027     | 0.996          | 30-500                              | <30                        |

| <b>Alcohols</b>           |                                      |          |          |     |    |        |        |       |              |       |
|---------------------------|--------------------------------------|----------|----------|-----|----|--------|--------|-------|--------------|-------|
| 32                        | Isobutanol <sup>c</sup>              | 78-83-1  | DI-SIM   | IS2 | 43 | 3.440  | 0.015  | 0.995 | 2340-1000000 | <2340 |
| 33                        | 1-Butanol <sup>a</sup>               | 71-36-3  | LLE-SIM  | IS2 | 56 | 1.056  | 0.008  | 0.995 | 3.9-1000     | <3.9  |
| 34                        | Isoamyl alcohol <sup>c</sup>         | 123-51-3 | DI-SIM   | IS2 | 55 | 2.932  | -0.042 | 0.999 | 3900-2000000 | <3900 |
| 36                        | 1-Pentanol <sup>a</sup>              | 71-41-0  | LLE-SIM  | IS2 | 70 | 0.694  | 0.002  | 0.998 | 1.4-200      | 1.4   |
| 38                        | 3-Methyl-1-Pentanol <sup>a</sup>     | 589-35-5 | LLE-SIM  | IS2 | 56 | 0.490  | 0.002  | 0.997 | 12.48-200    | 12.48 |
| 39                        | 1-Hexanol <sup>c</sup>               | 111-27-3 | DI-SIM   | IS2 | 56 | 2.374  | 0.008  | 0.999 | 780-200000   | <780  |
| 40                        | 3-Hexenol <sup>a</sup>               | 544-12-7 | LLE-SIM  | IS2 | 67 | 0.309  | 0.019  | 0.990 | 7.8-1000     | 7.8   |
| 41                        | Leaf alcohol <sup>a</sup>            | 928-96-1 | LLE-SIM  | IS2 | 67 | 2.444  | 0.052  | 0.995 | 12-1600      | 12    |
| 42                        | 1-Heptanol <sup>a</sup>              | 111-70-6 | LLE-SIM  | IS2 | 69 | 1.994  | 0.013  | 0.996 | 12.5-3200    | 12.5  |
| 43                        | 2-Ethyl-1-hexanol <sup>a</sup>       | 104-76-7 | LLE-SIM  | IS2 | 57 | 0.424  | 0.001  | 0.998 | 0.71-90      | 0.71  |
| <b>Acetals</b>            |                                      |          |          |     |    |        |        |       |              |       |
| 45                        | 1,1-Diethoxyethane <sup>b</sup>      | 105-57-7 | SPME-SIM | IS1 | 61 | 15.127 | 0.203  | 0.990 | 1500-15000   | <1500 |
| <b>Carbonyl compounds</b> |                                      |          |          |     |    |        |        |       |              |       |
| 47                        | Furfural <sup>a</sup>                | 98-01-1  | LLE-SIM  | IS1 | 67 | 0.386  | 0.010  | 0.999 | 5.2-1500     | 5.2   |
| 49                        | Ethyl 2-furoate <sup>a</sup>         | 614-99-3 | LLE-SIM  | IS1 | 95 | 0.252  | 0.010  | 0.994 | 9.06-580     | <9.06 |
| <b>Lactones</b>           |                                      |          |          |     |    |        |        |       |              |       |
| 50                        | $\gamma$ -Butyrolactone <sup>a</sup> | 96-48-0  | LLE-SIM  | IS1 | 56 | 0.276  | 0.001  | 0.988 | 0.78-200     | 0.78  |
| 51                        | $\gamma$ -Hexalactone <sup>a</sup>   | 695-06-7 | LLE-SIM  | IS1 | 85 | 1.657  | 0.006  | 0.998 | 50-800       | <50   |
| 53                        | $\gamma$ -Nonanolactone <sup>a</sup> | 104-61-0 | LLE-SIM  | IS1 | 85 | 0.512  | -0.002 | 0.996 | 0.78-100     | 0.78  |
| 54                        | $\gamma$ -Decalactone <sup>a</sup>   | 706-14-9 | LLE-SIM  | IS1 | 85 | 0.368  | -0.004 | 0.999 | 3.54-300     | 3.54  |

| Aromatic compounds |                                                 |            |         |     |     |       |        |       |           |      |
|--------------------|-------------------------------------------------|------------|---------|-----|-----|-------|--------|-------|-----------|------|
| 55                 | Benzaldehyde <sup>a</sup>                       | 100-52-7   | LLE-SIM | IS1 | 105 | 0.222 | 0.011  | 0.993 | 7.8-5000  | <7.8 |
| 56                 | Ethyl benzoate <sup>a</sup>                     | 93-89-0    | LLE-SIM | IS1 | 105 | 0.343 | 0.016  | 0.993 | 12.4-400  | 12.4 |
| 57                 | Benzyl acetate <sup>a</sup>                     | 140-11-4   | LLE-SIM | IS1 | 91  | 0.350 | 0.008  | 0.995 | 15.2-250  | 15.2 |
| 58                 | Phenethyl acetate <sup>a</sup>                  | 103-45-7   | LLE-SIM | IS1 | 91  | 0.674 | -0.043 | 0.997 | 20.3-5200 | 20.3 |
| 59                 | Benzyl alcohol <sup>a</sup>                     | 100-51-6   | LLE-SIM | IS2 | 79  | 0.572 | -0.052 | 0.993 | 7.0-1800  | 7    |
| 60                 | Phenylethyl alcohol <sup>a</sup>                | 60-12-8    | LLE-SIM | IS2 | 122 | 0.380 | -0.421 | 0.995 | 70-9000   | <70  |
| Terpenes           |                                                 |            |         |     |     |       |        |       |           |      |
| 61                 | Linalool <sup>a</sup>                           | 78-70-6    | LLE-SIM | IS2 | 93  | 0.525 | 0.019  | 0.991 | 2.6-200   | 2.6  |
| 62                 | Citronellol <sup>a</sup>                        | 106-22-9   | LLE-SIM | IS2 | 69  | 0.664 | -0.011 | 0.993 | 4-500     | 4    |
| 63                 | ( <i>E</i> )- $\beta$ -damascenone <sup>a</sup> | 23696-85-7 | LLE-SIM | IS1 | 121 | 4.665 | 0.057  | 0.996 | 20-720    | 20   |
| 65                 | <i>trans</i> -Nerolidol <sup>a</sup>            | 40716-66-3 | LLE-SIM | IS2 | 69  | 0.827 | 0.049  | 0.995 | 25-400    | 25   |
| 66                 | <i>trans</i> - $\beta$ -ionone <sup>a</sup>     | 79-77-6    | LLE-SIM | IS1 | 177 | 0.348 | 0.001  | 0.999 | 0.8-100   | 0.8  |
| 67                 | Eugenol <sup>a</sup>                            | 97-53-0    | LLE-SIM | IS2 | 149 | 0.588 | -0.007 | 0.999 | 3.8-500   | <3.8 |
| 68                 | ( <i>E,E</i> )-Farnesol <sup>a</sup>            | 106-28-5   | LLE-SIM | IS2 | 69  | 1.197 | 0.003  | 0.997 | 2-500     | 2    |
| Acids              |                                                 |            |         |     |     |       |        |       |           |      |
| 69                 | Acetic acid <sup>a</sup>                        | 64-19-7    | LLE-SIM | IS3 | 45  | 1.646 | 0.040  | 0.999 | 19-5000   | <19  |
| 70                 | 2-Methylpropanoic acid <sup>*a</sup>            | 79-31-2    | LLE-SIM | IS3 | 55  | 1.907 | 0.004  | 0.999 | 4-500     | 4    |
| 70                 | 2-Methylpropanoic acid <sup>c</sup>             | 79-31-2    | DI-SIM  | IS3 | 55  | 0.932 | 0.002  | 0.997 | 300-4000  | <300 |
| 71                 | Butyric acid <sup>a</sup>                       | 107-92-6   | LLE-SIM | IS3 | 60  | 1.107 | -0.003 | 0.999 | 3.9-1000  | 3.9  |
| 72                 | Isovaleric acid <sup>a</sup>                    | 503-74-2   | LLE-SIM | IS3 | 60  | 0.941 | 0.013  | 0.997 | 4-1000    | 4    |

|                 |                                   |          |         |     |    |       |        |       |            |        |
|-----------------|-----------------------------------|----------|---------|-----|----|-------|--------|-------|------------|--------|
| 72              | Isovaleric acid <sup>c</sup>      | 503-74-2 | DI-SIM  | IS3 | 60 | 1.459 | 0.001  | 0.999 | 312-20000  | <312   |
| 73              | Hexanoic acid <sup>a</sup>        | 142-62-1 | LLE-SIM | IS3 | 73 | 0.784 | 0.032  | 0.998 | 7.8-2000   | 7.8    |
| 75              | Octanoic acid <sup>a</sup>        | 124-07-2 | LLE-SIM | IS3 | 73 | 0.909 | -0.023 | 0.999 | 7.8-2000   | 7.8    |
| 77              | Decanoic acid <sup>a</sup>        | 334-48-5 | LLE-SIM | IS3 | 60 | 1.075 | 0.078  | 0.999 | 18.75-4000 | <18.75 |
| <b>Sulfides</b> |                                   |          |         |     |    |       |        |       |            |        |
| 79              | 3-Methylthiopropanol <sup>a</sup> | 505-10-2 | LLE-SIM | IS2 | 61 | 2.247 | -0.011 | 0.992 | 4.2-269.6  | <4.2   |

<sup>a</sup> Quantified by LLE-SIM. The standard solution was diluted into nine levels successively in CH<sub>2</sub>Cl<sub>2</sub>. A synthetic matrix (40% ethanol/water, pH = 4.0) was used to establish the calibration curves. <sup>b</sup> Quantified by SPME-SIM. <sup>c</sup> Quantified by DI-SIM. Aroma standards of each level were extracted and analyzed in triplicate under the same conditions as the samples. <sup>d</sup> Corresponding internal standard (IS) of compounds. IS1 indicates pentyl acetate, and IS 2 indicates 4-heptanol, IS 3 indicates 2-ethylbutanoic acid. \* represents the standard curve for quantitation of DS. Limit of quantitation (LOQ) of each volatile compounds were calculated based on the signal to noise ratio of 10 obtained by diluting the standard solutions. The LOQs expressed with lower than specific values meant that these compounds were detected with the signal to noise greater than 10 in the last dilution level solution. The linear ranges of each volatile compounds covered their concentrations in two types peach spirits in this study.

## References

Sun, X. F., Dang, G. F., Ding, X. B., Shen, C. X., Liu, G. P., Zuo, C. Y., Chen, X. J., Xing, W. H., & Jin, W. Q. (2020). Production of alcohol-free wine and grape spirit by pervaporation membrane technology. *Food and Bioprocess Processing*, 123, 262-273. <http://doi.org/10.1016/j.fbp.2020.07.006>.
